# Supplementary material for: Bayesian variable selection for binary outcomes in high-dimensional genomic studies using non-local priors
Source: PubMed Central journal article supplement — Bioinformatics. 2016 Jan 6;32(9):1338–45. doi: 10.1093/bioinformatics/btv764 (PMC4848399; doi:10.1093/bioinformatics/btv764), 2016-01-06
Supplement: supp_btv764_Supplementary_Feb_18th.pdf [file supp_btv764_Supplementary_Feb_18th.pdf]

# Bayesian Variable Selection for Binary Outcomes in High Dimensional Genomic Studies Using Non-Local Priors

## Supplementary Data

Amir Nikooienejad, Wenyi Wang and Valen E. Johnson

### 1 Simulation Studies

Average TP and FP for  $\beta_2$  and  $\beta_3$  explained in simulation studies in the paper.

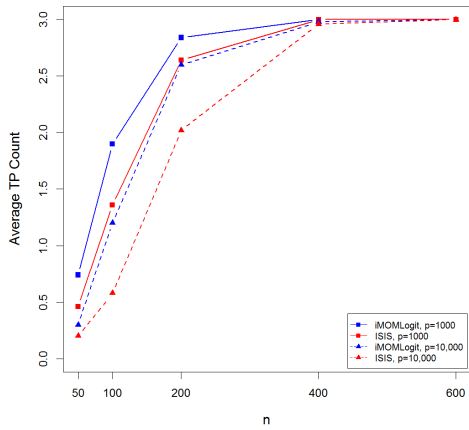

Average true positive count for  $\beta_2$

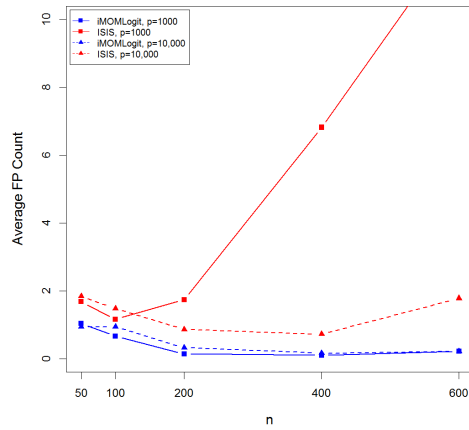

Average false positive count for  $\beta_2$

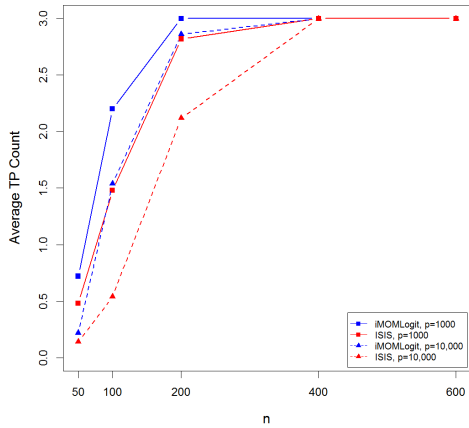

Average true positive count for  $\beta_3$

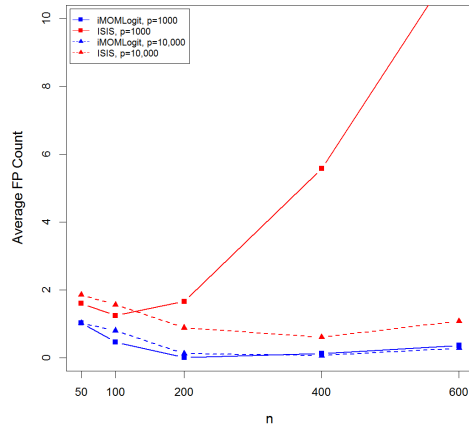

Average false positive count for  $\beta_3$

## 2 Sensitivity Analysis for Prior Parameters on Model Space

The figure below depicts  $\text{MSE}(\hat{\pi})$  for different values of  $a$  for  $n = 200$ ,  $p = 1000$  and  $\beta = [4, 5, 6]^T$ . The output at nominal value of  $a$  is indicated by a red square. As shown in this figure, the value of output does not change dramatically with changes in  $a$ .

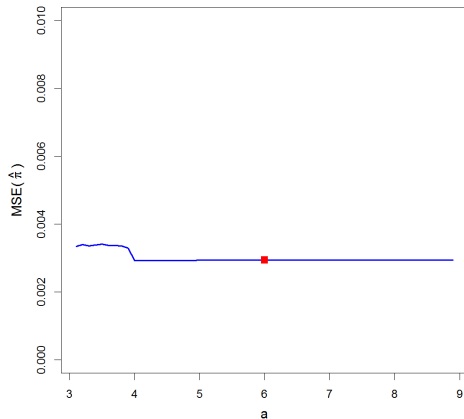

Sensitivity analysis for parameters of prior on model space

## 3 Discussion on $1/\sqrt{p}$ Overlap

Our rationale for setting the overlap between the sampling distribution of the MLE and the prior density to be  $p^{-1/2}$  can be explained as follows. For simplicity, we motivate our criterion in the context of a scalar-valued parameter  $\theta$ . Let  $p(\theta)$  denote the prior density for  $\theta$  under a nonlocal prior defining the alternative hypothesis,  $H_1$ , and let  $f(\theta) = \prod_{i=1}^n f_i(x_i|\theta)$  denote the likelihood function, and let  $i(\hat{\theta})$  denote the observed information evaluated at the MLE  $\hat{\theta}$ , i.e.,

$$i(\hat{\theta}) = - \left. \frac{\partial^2 \log f(\theta)}{\partial \theta^2} \right|_{\theta=\hat{\theta}}.$$

Under the null hypothesis,  $\theta = 0$ . The marginal likelihood function under the alternative hypothesis can be approximated using Laplace's method as

$$m_1(\hat{\theta}) \approx \sqrt{\frac{2\pi}{i(\hat{\theta})}} f(\hat{\theta}) p(\hat{\theta}),$$

while under the null model the marginal density of the data is simply

$$m_0 = f(0).$$

In large samples when the null hypothesis is true,

$$f(\hat{\theta}) \approx f(0) e^{\eta(\hat{\theta})/2},$$

where  $\eta$  is a chi-squared random variable, which is bounded in probability. Also, for large  $n$ , the observed information  $i(\hat{\theta})$  converges to Fisher's information,  $I(0)$ . Define  $w$  to be

$$w = \sqrt{\frac{2\pi}{I(0)}}.$$

Now let  $g(\hat{\theta})$  denote the sampling distribution of the maximum likelihood estimate under the null hypothesis. We assume that this sampling density is approximately normally distributed around 0 and let  $\pm x$  denote the point at which the sampling density of the MLE and the non-local prior densities overlap. Under our constraint on the overlap between densities, the expected value of  $m_1$  satisfies

$$\begin{aligned} E_0[m_1(\hat{\theta})]/w &\approx \int_{|\hat{\theta}|<x} f(0)e^{\eta(\hat{\theta})/2}p(\hat{\theta})g(\hat{\theta})d\hat{\theta} + \int_{|\hat{\theta}|>x} f(0)e^{\eta(\hat{\theta})/2}p(\hat{\theta})g(\hat{\theta})d\hat{\theta} \\ &\leq \max[g(\hat{\theta})] \int_{|\hat{\theta}|<x} f(0)e^{\eta(\hat{\theta})/2}p(\hat{\theta}) + \max[p(\hat{\theta})] \int_{|\hat{\theta}|>x} f(0)e^{\eta(\hat{\theta})/2}g(\hat{\theta})d\hat{\theta} \\ &\leq \max[g(\hat{\theta}), p(\hat{\theta})] \left[ \int_{|\hat{\theta}|<x} f(0)e^{\eta(\hat{\theta})/2}p(\hat{\theta}) + \int_{|\hat{\theta}|>x} f(0)e^{\eta(\hat{\theta})/2}g(\hat{\theta})d\hat{\theta} \right] \\ &\approx \max[g(\hat{\theta}), p(\hat{\theta})]f(0)e^{\eta'/2} \frac{1}{\sqrt{p}} \end{aligned}$$

for some random variable  $\eta'$  that is bounded in probability. The Bayes factor in favor of the larger model is thus

$$BF_{10} < w \max[g(\hat{\theta}), p(\hat{\theta})] \exp(\eta'/2) \frac{1}{\sqrt{p}}.$$

For large  $n$ , the second term on the right hand side of the inequality is determined by the sampling distribution of the MLE and is  $O_p(n^{1/2})$ , while  $w$  is  $O(n^{-1/2})$ . Thus, the average Bayes factor is  $O_p(p^{-1/2})$ , and combined with the beta-binomial prior on the model space (which imposes a penalty that is  $O(1/p)$  on new variables), this suggests that the number of false positives under the null model of no effects will decrease to 0 as  $p$  increases.
